# Supplementary material
Source: Royal Society of Chemistry journal article supplement (doi:10.1039/d5nr05019g)

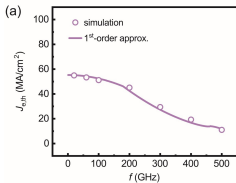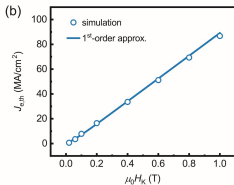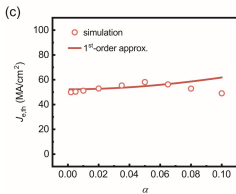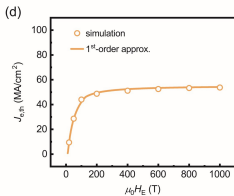

Supplement: d5nr05019g10.pdf [file d5nr05019g10.pdf]

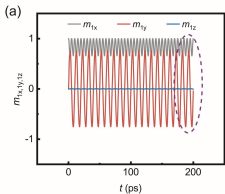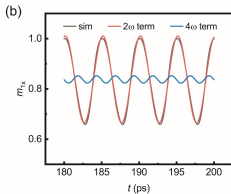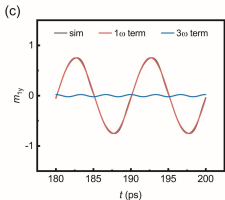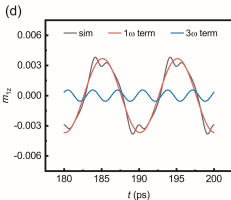

Supplement: d5nr05019g11.pdf [file d5nr05019g11.pdf]

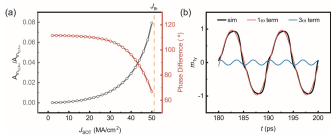

Supplement: d5nr05019g12.pdf [file d5nr05019g12.pdf]

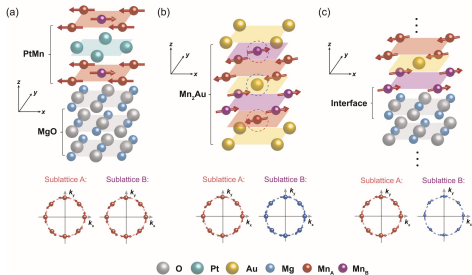

Supplement: d5nr05019g2.pdf [file d5nr05019g2.pdf]

Supplementary Information (SI) for Nanoscale.  
This journal is © The Royal Society of Chemistry 2026

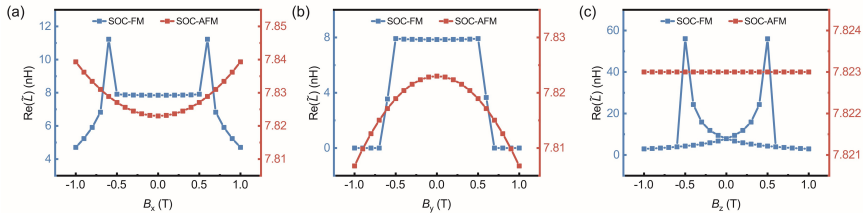

Supplement: d5nr05019g3.pdf [file d5nr05019g3.pdf]

Supplementary Information (SI) for Nanoscale.  
This journal is © The Royal Society of Chemistry 2026

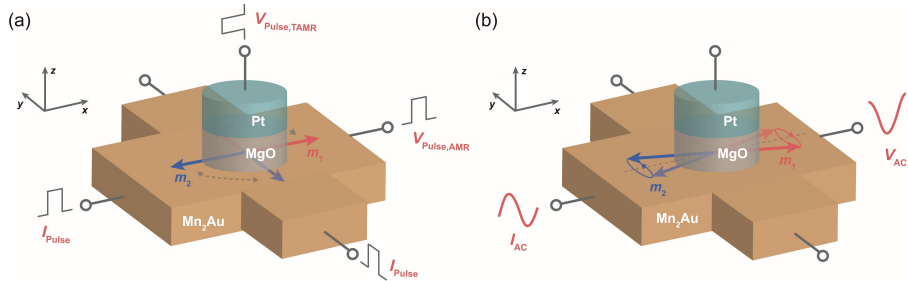

Supplement: d5nr05019g4.pdf [file d5nr05019g4.pdf]

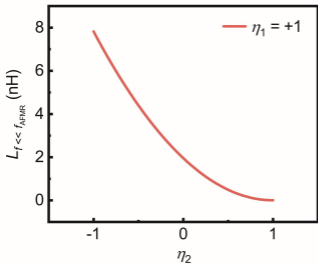

Supplement: d5nr05019g5.pdf [file d5nr05019g5.pdf]

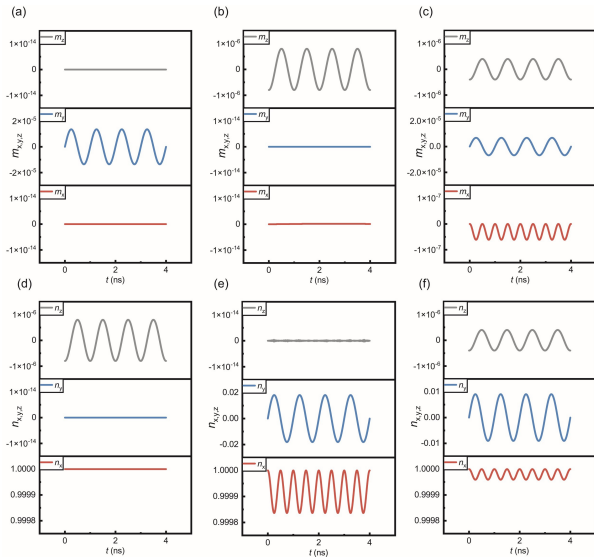

Supplement: d5nr05019g7.pdf [file d5nr05019g7.pdf]

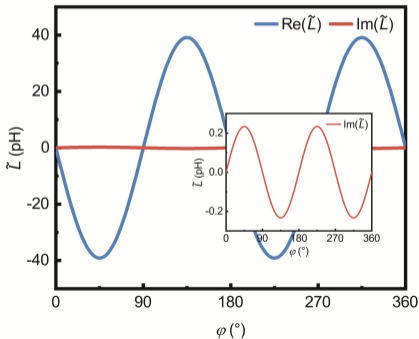

Supplement: d5nr05019g8.pdf [file d5nr05019g8.pdf]

Supplementary Information (SI) for Nanoscale.  
This journal is © The Royal Society of Chemistry 2026

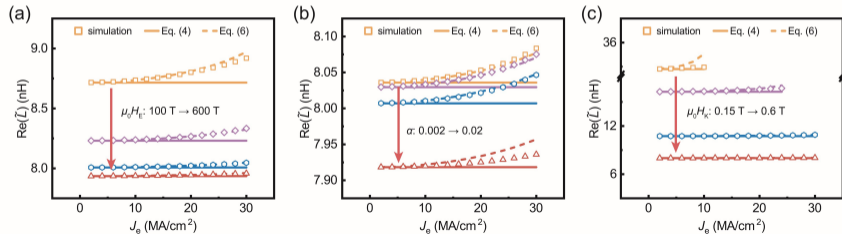

Supplement: d5nr05019g9.pdf [file d5nr05019g9.pdf]
